# Supplementary figures and images for: Crystal structure and magnetocaloric effect of non-rare-earth KBa8Fe12(Bi6−xFex)O38
Source: Royal Society of Chemistry journal article supplement (doi:10.1039/d2ce01396g), 2022-11-08

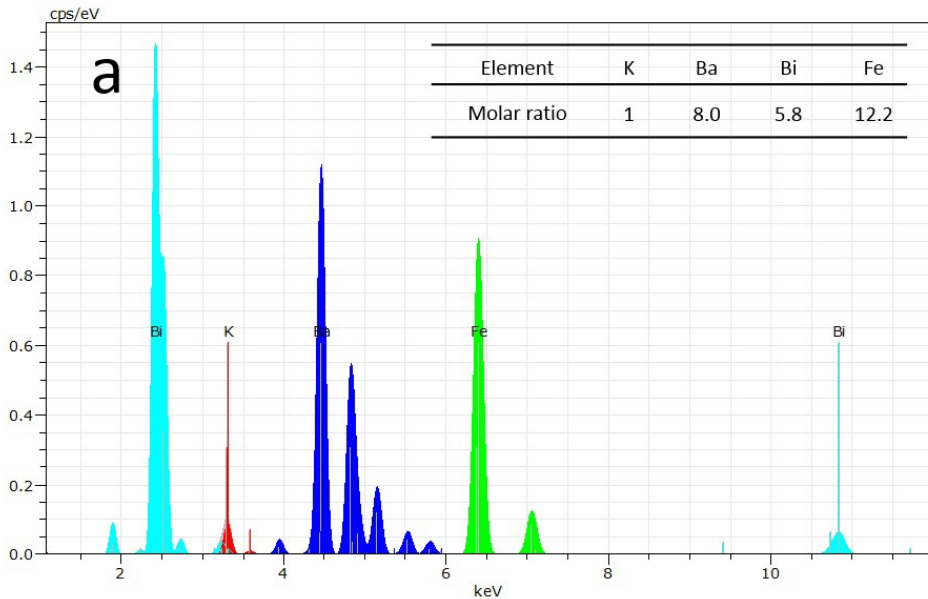

Supplement: d2ce01396g1.pdf [file d2ce01396g1.pdf]

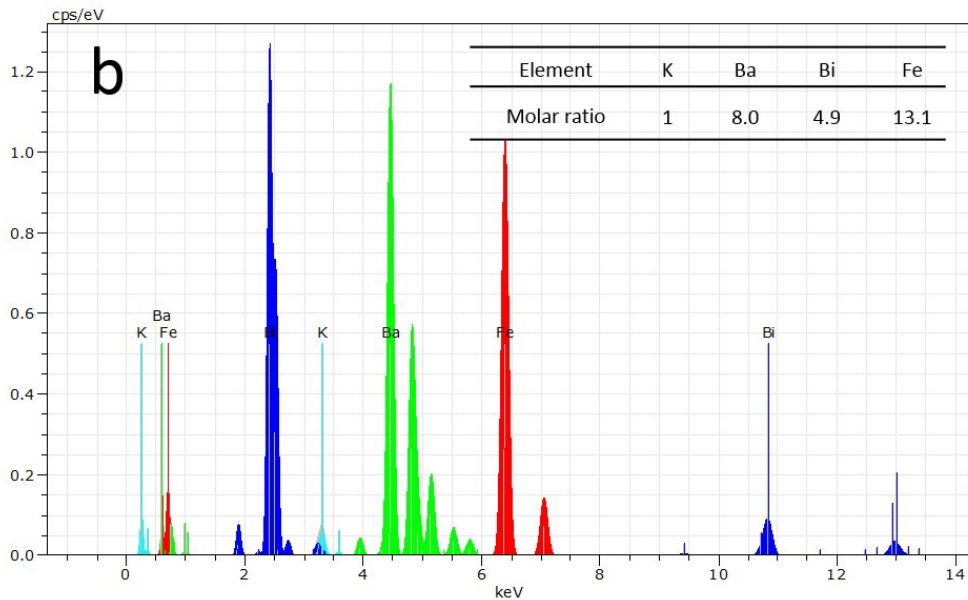

Supplement: d2ce01396g2.pdf [file d2ce01396g2.pdf]

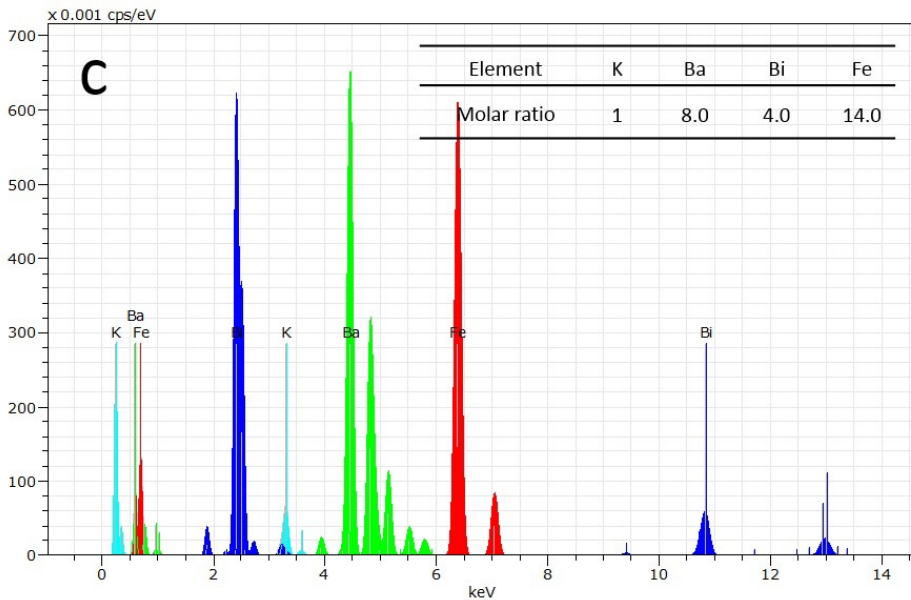

Supplement: d2ce01396g3.pdf [file d2ce01396g3.pdf]

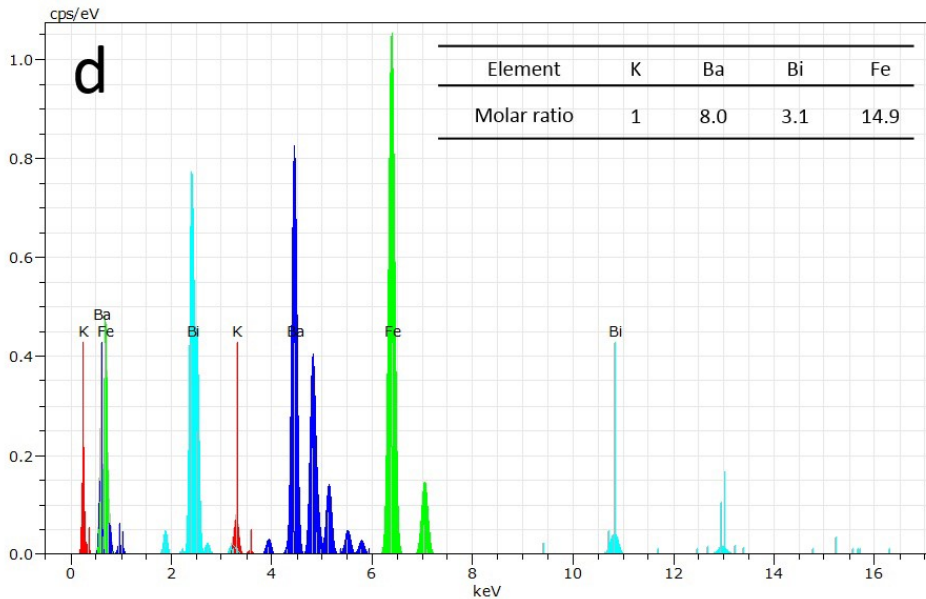

Supplement: d2ce01396g4.pdf [file d2ce01396g4.pdf]

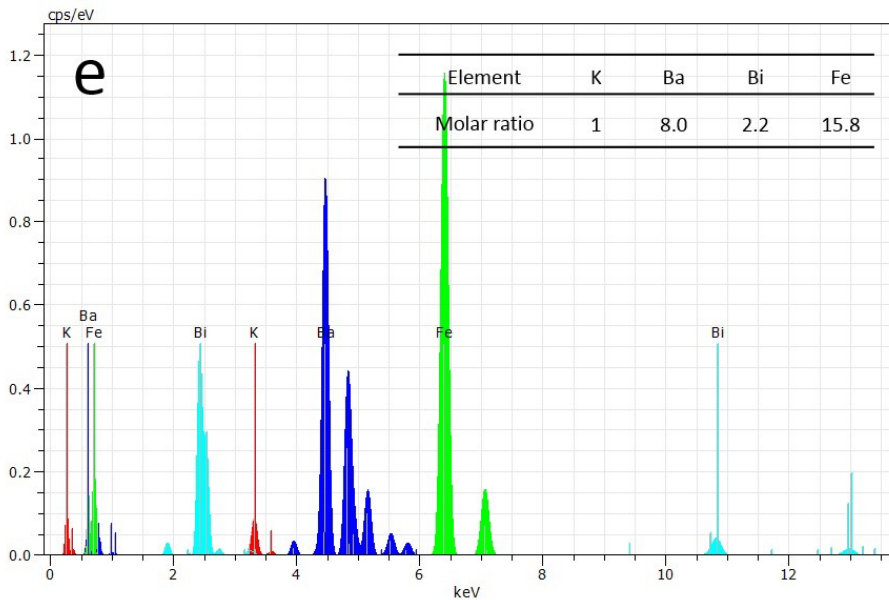

Supplement: d2ce01396g5.pdf [file d2ce01396g5.pdf]
